# Supplementary material
Source: PubMed Central journal article supplement (PMC3963554)
Supplement: bmjqs-2012-001774-s1.pdf [file bmjqs-2012-001774-s1.pdf]

## Appendix Text A. Literature Searches

The 14 studies for the previously published systematic review and meta-analysis (Meddings et al, *Clin Infect Dis*, 2010) were obtained from a comprehensive search of the world's literature for interventions from 1950 to 2008 to decrease catheter-associated urinary tract infections by means of the MEDLINE and Cochrane databases (using Ovid), the PubMed Journals and Medical Subject Heading (MeSH) datasets, the ISI Web of Knowledge databases (Web of Science and Biosis Previews) and the CINAHL and EMBASE databases. The MEDLINE and Cochrane database searches were conducted by exploding and combining the following Medical Subject Heading (MeSH) terms: *urinary tract infection, urinary catheterization, indwelling catheter, inpatient, reminder system, device removal, intervention studies*. The MeSH *reminder system* was also searched separately. We included the following terms in a keyword search (with wildcard indicated with \*): *urinary tract infection; ((urin\* or uret\*) and cath\*)) or catheter\*; nosocomial or inpatient or hospital\*; reminder, removal, and intervention*. We used similar strategies with the other databases. A research librarian provided guidance to improve search completeness. This search yielded 6679 citations, including many duplicate citations. As our initial search was broad and yielded many guidelines and reviews published regarding prevention of catheter-associated urinary tract infection, we also evaluated these articles' reference lists for additional studies; 1 additional reference was located in this manner. More detailed review was required for 118 articles to determine whether they met inclusion criteria. After applying inclusion and exclusion criteria to focus on human studies of adults admitted to acute care hospitals reporting at least one outcome involving catheter use or CAUTI events as a result of the intervention, and with a comparison group (either pre- versus post-

intervention or a separate control group); this yielded 16 studies for further review. Two authors of the systematic review (J.M. and M.M.) independently reviewed and abstracted data from the 16 articles that appeared to meet inclusion criteria, including setting, study population, inclusion/exclusion criteria, definitions used, health outcomes, and quality issues. A third investigator (S.S.) resolved any differences in abstraction and reviewed the joint decisions made to exclude 2 of the 16 articles that no longer met inclusion criteria after further review. As a result, this systematic search in 2008 yielded the 14 articles reviewed in the previously published meta-analysis.<sup>1-14</sup>

To update the prior literature search for this manuscript, a search was performed of MEDLINE and Cochrane databases (using Ovid) and PubMed for intervention studies (published from August 2008 to February 2012) to reduce use of unnecessary urinary catheters in the acute care of adults, using the same detailed search strategy as employed in the 2008 search. Yet, unlike the 2008 search which was focused on removal of recently placed indwelling catheters (and which excluded emergency environments), the patient population for the 2012 search was expanded to include emergency department patients. The search was expanded because use of interventions to restrict initial placement was an additional topic of interest for this review. The 2012 search results were also supplemented with prior lists of articles excluded from the prior 2008 search that were focused on emergency department interventions. A secondary evaluation of the CINAHL database was also performed for interventions developed and implemented by nurses related to urinary catheter use. In light of the somewhat different terminology on the topic found in the nursing literature, we searched CINAHL using variations of the following terms: *reminder*, *removal*, *urinary catheter*, *nurse empowered*, *nurse directed*,

*nurse protocol*. No date limits were employed in the CINAHL search, which retrieved 5 records. Overall, the MEDLINE and CINAHL searches yielded 479 citations, including 353 from MEDLINE through Ovid, 9 additional from PubMed, 117 from the Cochrane EBM databases, and 7 duplicates. Studies were included if at least one outcome involving catheter use or CAUTI events (Appendix Table) was reported as a result of the intervention with a comparison group. A review of reference lists for additional studies was also performed, yielding one additional study. We applied inclusion and exclusion criteria to focus on human studies of adult patients with at least one outcome involving catheter use or CAUTI events reported as a result of the intervention, and with a comparison group. After applying this criteria, the updated search yielded 12 intervention studies published since the prior meta-analysis.<sup>15-26</sup>

An additional update of this literature search was performed October 23, 2012 (for literature published from February 2012 to October 23, 2012) using the same databases and search criteria that was performed in February 2012, yielding 97 additional citations for consideration. After applying the same inclusion/exclusion criteria as previously, 74 articles were excluded by title and abstract review yielding 23 studies to review further of the full text and reference lists. Of these 23 articles, 4 articles<sup>27-30</sup> were intervention studies with reminder or stop-order interventions were appropriate for inclusion (increasing the number of reminder and stop-order intervention studies to 16 since the prior meta-analysis). 1 article was a meta-analysis of bladder scanner protocols<sup>31</sup> as interventions to decrease catheter placement with a reference list that yielded 3 individual studies<sup>32-34</sup> for the Appendix Table.

## **Appendix Text B. Methods**

As summarized in the previously published meta-analysis for the 14 selected studies from 2008 or earlier, a systematic review process was performed. Correspondence with 24 authors was initiated to clarify details regarding the interventions and outcomes with responses received from 11 authors, and 4 authors provided unpublished numeric data necessary for statistical pooling. Two physician reviewers performed a detailed abstraction of the 14 studies. Details of the statistical analyses for obtaining the pooled effects are detailed in the prior published analyses, and were not replicated or expanded for writing this review.

A similar review and abstraction process was performed by one physician (J.M.) for the 16 recent articles in the updated search. Contact was initiated with authors of 3 of the most recent articles<sup>15,19,27</sup> to obtain clarification of study population characteristics and/or results data. Dr. Adams reviewed the data and confirmed and provided the correct pre and post intervention daily catheter prevalence rates (which were correct in the published text), and also provided the number of patients studied. Dr. Johnson (corresponding author for Knoll et al <sup>19</sup>) responded to our queries but could not provide the number of patients in the study groups. Dr. Bruminhent did not respond to our queries. These 16 articles were analyzed and abstracted by J.M. as potential candidates for inclusion in the updated meta-analyses, and also summarized in a narrative method in Appendix Table and Table 3.

Important outcomes of the 30 studies with reminder and/or stop order interventions (14 studies from prior meta-analysis<sup>35</sup> and 16 more recently identified studies) as previously published in the meta-analyses were summarized in Table 3.. Additional details

(study design, country of origin, patient population size, care environment, all intervention details) are summarized in the Appendix Table.

**Statistical Analyses.** Analyses were conducted using Stata/MP, version 12.1 (StataCorp). Pooled estimates were obtained using DerSimonian-Laird random effects models. Heterogeneity among studies was assessed using between-study variance ( $\tau^2$ ) and the Higgins and Thompson  $I^2$  (percentage of variability in the intervention attributable to heterogeneity). All tests were two-sided, and the type I error rate was set at 0.05.

**Appendix Table. Characteristics of Studies with Interventions to Avoid Unnecessary Urinary Catheter Use.**

| Study (Country)                                     | Study Design                   | Population, Total N                       | Interventions to avoid unnecessary catheter PLACEMENT                                                                                                            | Interventions to prompt REMOVAL of unnecessary catheters                                                                                                                   | Other Interventions                                                                                            |
|-----------------------------------------------------|--------------------------------|-------------------------------------------|------------------------------------------------------------------------------------------------------------------------------------------------------------------|----------------------------------------------------------------------------------------------------------------------------------------------------------------------------|----------------------------------------------------------------------------------------------------------------|
| Adams et al, 2010 <sup>27</sup> (UK)                | Pre-Post                       | Medical (non-ICU), N=136 patients         | None                                                                                                                                                             | <b>Stop-order, nurse-empowered:</b> Nurse-led protocol to remove all urinary catheters that did not meet criteria.                                                         | None                                                                                                           |
| Andreessen et al, 2012 <sup>28</sup> (USA)          | Pre-post                       | Med-Surg (unclear if ICU). N=141 patients | Computerized UC order required selection of an appropriate UC indication<br><br>Promoted use of alternatives for indwelling UCs<br><br>Bladder scanner protocol. | <b>Stop-order:</b> Automated computer stop order directed at physicians/providers, requiring reassessment and re-ordering every 24 hours, or discontinues use of catheter. | Bundle included UC care steps, standardized UC kits. Computer documentation of placement and maintenance care. |
| Apisarnthanarak et al, 2007 <sup>1</sup> (Thailand) | Pre-Post                       | All Inpatients, N=2412 patients           | None                                                                                                                                                             | <b>Reminder:</b> Nurse-generated daily bedside verbal reminders to encourage physicians to remove unnecessary UC.                                                          | None                                                                                                           |
| Bruminhent et al, 2010 <sup>15</sup> (USA)          | Pre-Post                       | Med-Surg: Ward + ICU, N=400 patients      | None                                                                                                                                                             | <b>Reminder:</b> Sticker applied to medical record to remind physicians to discontinue unnecessary UCs.                                                                    | None                                                                                                           |
| Cornia et al, 2003 <sup>2</sup> (USA)               | Non-randomized crossover trial | Medical (non-ICU), N=70 patients          | Computerized UC order required selection of an appropriate UC indication                                                                                         | <b>Stop order:</b> Computer-generated stop order for physicians to discontinue/renew UC order 72 hours after placement.                                                    | UC care education                                                                                              |
| Crouzet et al, 2007 <sup>3</sup> (France)           | Pre-Post                       | All Inpatients, N=234 patients            | None                                                                                                                                                             | <b>Reminder:</b> Daily reminders from nurses to physicians to remove unnecessary UC $\geq 4$ days after insertion.                                                         | None                                                                                                           |
| Dumigan et al, 1998 <sup>4</sup> (USA)              | Pre-Post                       | ICU: Med-Surg, N=27103 patient-days       | Guideline for appropriate UC indications                                                                                                                         | <b>Stop order, nurse-empowered:</b> Daily use of UC indication protocol by nurse empowered to remove UC no longer meeting criteria without requesting physician order.     | UC care education                                                                                              |

|                                                    |                                         |                                                                                                 |                                                                                                                                                           |                                                                                                                                                                                                          |      |
|----------------------------------------------------|-----------------------------------------|-------------------------------------------------------------------------------------------------|-----------------------------------------------------------------------------------------------------------------------------------------------------------|----------------------------------------------------------------------------------------------------------------------------------------------------------------------------------------------------------|------|
| Elpern et al, 2009 <sup>16</sup><br>(USA)          | Pre-Post                                | ICU: Medical,<br>N=337 patients                                                                 | Appropriate indications for UC<br>insertion were emphasized, and<br>list of inappropriate reasons to<br>insert was provided                               | <b>Reminder:</b> Daily review by nurses for<br>UC indication to make<br>recommendations for removal; removal<br>required physician order.                                                                | None |
| Fakih et al, 2008 <sup>5</sup><br>(USA)            | Pre-Post with<br>concurrent<br>controls | Med-Surg (non-ICU)<br>N=3736 intervention<br>patient-days, and<br>4041 control patient-<br>days | None                                                                                                                                                      | <b>Reminder:</b> Nurse generated reminder to<br>physician to remove UC when no<br>appropriate indication.                                                                                                | None |
| Fakih et al, 2010 <sup>36</sup><br>(USA)           | Pre-Post                                | ED,<br>N=322 patients had<br>UCs placed, of 2517<br>ED patients in<br>sample                    | Institutional guidelines for<br>appropriate UC placement, ED<br>physician education regarding<br>UC utilization                                           | None                                                                                                                                                                                                     | None |
| Fakih et al, 2012 <sup>37</sup><br>(USA)           | Pre-Post                                | Statewide, N=163<br>inpatient units in<br>71 hospitals                                          | Education intervention to<br>promote adherence to<br>appropriate UC indications                                                                           | None                                                                                                                                                                                                     | None |
| Frederickson et al,<br>2000 <sup>33</sup><br>(USA) | Pre-post by<br>concurrent<br>controls   | Surgery<br>N=103                                                                                | Bladder ultrasound program<br>compared with standard care by<br>ISCs                                                                                      | None                                                                                                                                                                                                     | None |
| Fuchs et al, 2011 <sup>17</sup><br>(USA)           | Pre-Post                                | ICU: Med-Surg,<br>N=not provided                                                                | Urinary retention protocol,<br>including use of bladder<br>scanner<br><br>Procedure-specific protocols<br>for appropriate indications for<br>UC placement | <b>Stop order:</b> Daily checklist for<br>evaluating UCs; when not indicated,<br>physician order was requested for<br>removal.<br><br><b>Stop order:</b> Procedure-specific<br>protocols for UC removal. | None |
| Gokula et al,<br>2007 <sup>38</sup> (USA)          | Pre-Post                                | ED,<br>N=200 patients with<br>UCs placed in ED                                                  | UC indication checklist<br>attached to UC kits                                                                                                            | None                                                                                                                                                                                                     | None |
| Gotelli et al,<br>2008 <sup>18</sup> (USA)         | Pre-Post                                | Medical (not ICU),<br>N=not provided                                                            | None                                                                                                                                                      | <b>Stop order, nurse-empowered:</b><br>Nurses were empowered to assess UC<br>need by protocol and remove if not<br>indicated.                                                                            | None |

|                                             |          |                                              |                                                                                                                                                             |                                                                                                                                                                                        |                                                                 |
|---------------------------------------------|----------|----------------------------------------------|-------------------------------------------------------------------------------------------------------------------------------------------------------------|----------------------------------------------------------------------------------------------------------------------------------------------------------------------------------------|-----------------------------------------------------------------|
| Huang et al, 2004 <sup>6</sup><br>(Taiwan)  | Pre-Post | ICU: Med-Surg,<br>N=6297 patients            | None                                                                                                                                                        | <b>Reminder:</b> Nurse generated daily reminder to physician to remove unnecessary UC 5 days after insertion.                                                                          | None                                                            |
| Jain et al, 2006 <sup>7</sup><br>(USA)      | Pre-Post | ICU: Med-Surg,<br>N=13471<br>catheter-days   | None                                                                                                                                                        | <b>Reminder:</b> Daily use of checklist in multidisciplinary rounds to determine if UC still indicated, then nurse contacted physician for order to removal UC if no longer indicated. | Bundle included UC care steps, selected use of silver-alloy UC. |
| Knoll et al, 2011 <sup>19</sup><br>(USA)    | Pre-Post | All Inpatients,<br>N=112,140<br>patient-days | Educational interventions about an approved hospital list of UC indications<br><br>Computer UC order template with indication                               | <b>Stop order:</b> Computerized order for UC with indications and 72 h default stop date.<br><br><b>Reminder:</b> ICU daily checklist for UC necessity.                                | Bundle included UC care education, dedicated UC nurse.          |
| Lee et al, 2007 <sup>32</sup><br>(Taiwan)   | Pre-Post | Surgery<br>(Neurosurgery)<br>N=244 patients  | Bladder ultrasound program                                                                                                                                  | None                                                                                                                                                                                   | None                                                            |
| Loeb et al, 2008 <sup>8</sup><br>(Canada)   | RCT      | Medical (non-ICU),<br>N=692 patients         | None                                                                                                                                                        | <b>Stop order, nurse-empowered:</b> Pre-written in chart for nurses empowered to discontinue UC based on criteria without an additional physician order.                               | None                                                            |
| Murphy et al,<br>2007 <sup>9</sup> (USA)    | Pre-Post | Not explained,<br>N=Not provided             | None                                                                                                                                                        | <b>Reminder:</b> Foley bag sticker with time/date of insertion to remind to nurse to notify physician when Foley in place >48h in order to request removal.                            | UC care education                                               |
| Patrizzi et al,<br>2009 <sup>39</sup> (USA) | Pre-Post | ED,<br>N=Not provided                        | Computerized ED UC order with indications, UC alternatives promoted, urinary retention protocol with bladder scanner use                                    | None                                                                                                                                                                                   | None                                                            |
| Reilly et al, 2008 <sup>10</sup><br>(USA)   | Pre-Post | ICU: Med-Surg,<br>N=207 patients             | Developed criteria for appropriate UC placement in ICU, implemented with educational interventions regarding UC indications, and urinary retention protocol | <b>Reminder:</b> Daily use of checklist of appropriate UC indications by nurse, reminding nurse to contact physician to recommend UC removal.                                          | UC care education                                               |

|                                                      |                                                 |                                                                                                 |                                                                                      |                                                                                                                                                                    |                                                                |
|------------------------------------------------------|-------------------------------------------------|-------------------------------------------------------------------------------------------------|--------------------------------------------------------------------------------------|--------------------------------------------------------------------------------------------------------------------------------------------------------------------|----------------------------------------------------------------|
| Robinson et al, 2007 <sup>20</sup> (USA)             | Pre-Post                                        | Med-Surg (non-ICU), N=69 patients                                                               |                                                                                      | <b>Stop order:</b> Nurse identified patients without appropriate indications, then requested removal order from physicians.                                        | None                                                           |
| Roser et al, 2012 <sup>29</sup> (USA)                | Pre-Post                                        | Med-Surg (including ICU), N=not provided                                                        | Educational intervention described regarding appropriate reasons for insertion       | <b>Stop order, nurse empowered:</b> nurse driven urinary catheter removal protocol, empowering removal of urinary catheter within 24 hours unless contraindicated. | AHRQ CUSP program to end all healthcare associated infections. |
| Rothfeld et al, 2010 <sup>21</sup> (USA)             | Pre-Post                                        | Medical ICU step-down unit, N=99 patients                                                       | Developed list of appropriate indications for which UCs could be requested by nurses | <b>Stop order:</b> Nurses asked physicians for order to remove UCs when not indicated.                                                                             | None                                                           |
| Saint et al, 2005 <sup>11</sup> (USA)                | Pre-Post with concurrent nonequivalent controls | Intervention Group: Medical, Control Group: Surgery. N=3027 patients                            | None                                                                                 | <b>Reminder:</b> Study nurse generated sticker placed in chart reminding physician to generate stop order after 48 hours of UC use if no longer needed.            | None                                                           |
| Schultz et al, 2011 <sup>22</sup> (USA)              | Pre-Post                                        | ICU: unclear type, N=Not provided                                                               | Urinary retention protocol, including use of bladder scanner                         | <b>Stop order, nurse-empowered:</b> Nurses were empowered to insert and remove UCs by protocol.                                                                    | None                                                           |
| Seguin et al, 2010 <sup>23</sup> (France)            | Pre-Post                                        | ICU: Surgical, N=1271 patients                                                                  | None                                                                                 | <b>Stop order:</b> Daily assessment required by physicians to assess if UC is needed or not; when categorized as not indicated, then removed by nurses.            | None                                                           |
| Slappendel & Weber, 1999 <sup>34</sup> (Netherlands) | Pre-Post                                        | Surgery: Ward + ICU N=4116 patients                                                             | Bladder ultrasound program                                                           | None                                                                                                                                                               | None                                                           |
| Stephan et al, 2006 <sup>12</sup> (Switzerland)      | Pre-Post with concurrent nonequivalent controls | Surgery: Ward+ICU<br><u>Intervention:</u> Orthopedic, N=539<br><u>Control:</u> Abdominal, N=489 | UC placement restrictions, urinary retention protocol                                | <b>Stop order:</b> Pre-operative written order to remove UC on post-operative day 1 or 2, depending on surgery.                                                    | UC care education                                              |

|                                                       |          |                                                   |                                                                                                         |                                                                                                                                                                                                                                                                                                                              |                                                                                                                      |
|-------------------------------------------------------|----------|---------------------------------------------------|---------------------------------------------------------------------------------------------------------|------------------------------------------------------------------------------------------------------------------------------------------------------------------------------------------------------------------------------------------------------------------------------------------------------------------------------|----------------------------------------------------------------------------------------------------------------------|
| Titsworth et al, 2012 <sup>30</sup> (USA)             | Pre-Post | ICU (Neurologic)                                  | UTI bundle included insertion criteria and promotion of UC alternatives including bladder scanning use. | <p><b>Stop order:</b> post-op removal of catheters by default by nurses if not explicitly ordered.</p> <p><b>Reminder:</b> daily Foley rounds in ICU by nurses; if no clear indication found, patient name given to critical care medicine attending as reminder to place catheter removal order if no indication found.</p> | Bladder Bundle: UC care steps, standardized UC kits. Modules for sterile catheter technique, antimicrobial catheters |
| Topal et al, 2005 <sup>13</sup> (USA)                 | Pre-Post | Medical (non-ICU), N = 245 patients               | Urinary retention protocol including bladder scanner                                                    | <p><b>Stop order:</b> Computerized order entry system order to prompt physicians to remove/re-order UC if placed in ED or in place &gt;48 hours.</p> <p><b>Stop order, nurse-empowered:</b> Nurses were also empowered to remove UCs no longer needed by protocol criteria.</p>                                              | UC care education                                                                                                    |
| van den Broek et al, 2011 <sup>24</sup> (Netherlands) | Pre-Post | All Inpatients, in 5 hospitals, N=2943 patients   | Bladder scanner protocol in 2 hospitals                                                                 | <p><u>Intervention varied by hospital:</u></p> <p><b>Reminders:</b> Used by 4 hospitals, placed in patient's record.</p> <p><b>Stop order:</b> Fixed order for removal, employed by 1 hospital.</p>                                                                                                                          | Specially trained UC nurse                                                                                           |
| Voss, 2009 <sup>25</sup> (USA)                        | Pre-Post | Medical (non-ICU), N=187 patients age 65 or older | None                                                                                                    | <p><b>Stop order, nurse-empowered:</b> Daily assessment by nurse for UC indications, with authority for nurse to remove if not indicated.</p>                                                                                                                                                                                | None                                                                                                                 |
| Weitzel, 2008 <sup>14</sup> (USA)                     | Pre-Post | Medical (unclear if ICU), N=50 patients           | None                                                                                                    | <p><b>Reminder:</b> Daily use of protocol by nurse to review if UC still indicated, unclear if protocol allowed for UC removal without physician order.</p>                                                                                                                                                                  | None                                                                                                                 |
| Wenger, 2010 <sup>26</sup> (USA)                      | Pre-Post | All Inpatients, N=Not provided                    | None                                                                                                    | <p><b>Stop order, nurse-empowered:</b> Daily assessment by nurse of UC necessity, with authority to remove if not indicated.</p>                                                                                                                                                                                             | UC care education, silver-alloy UC                                                                                   |

ICU=intensive care unit; UC=urinary catheter; UTI=urinary tract infection

**Appendix Figure 1.** Meta-analysis of rate ratios (RRs) for catheter-associated urinary tract infection (CAUTI) episodes per 1000 catheter days, for intervention vs. control groups, stratified by focus on intensive care units (ICUs).  
CI, confidence interval

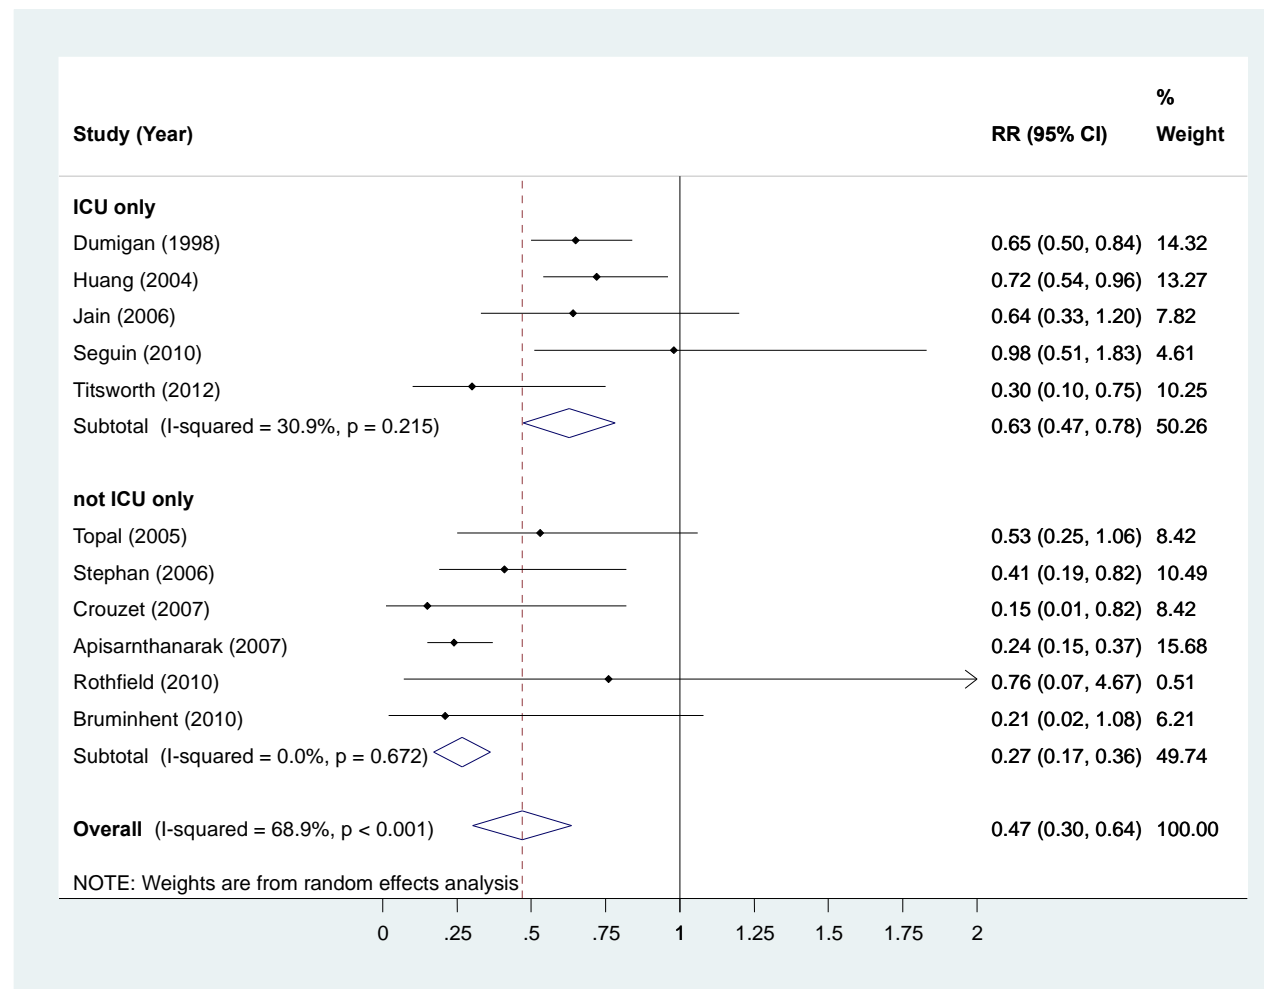

## References

1. Apisarnthanarak A, Thongphubeth K, Sirinvaravong S, *et al.* Effectiveness of multifaceted hospitalwide quality improvement programs featuring an intervention to remove unnecessary urinary catheters at a tertiary care center in Thailand. *Infect Control Hosp Epidemiol.* 2007;28(7):791-798.
2. Cornia PB, Amory JK, Fraser S, *et al.* Computer-based order entry decreases duration of indwelling urinary catheterization in hospitalized patients. *Am J Med.* 2003;114(5):404-407.
3. Crouzet J, Bertrand X, Venier AG, *et al.* Control of the duration of urinary catheterization: impact on catheter-associated urinary tract infection. *J Hosp Infect.* 2007;67(3):253-257.
4. Dumigan DG, Kohan CA, Reed CR, *et al.* Utilizing national nosocomial infection surveillance system data to improve urinary tract infection rates in three intensive-care units. *Clin Perform Qual Health Care.* 1998;6(4):172-178.
5. Fakh MG, Dueweke C, Meisner S, *et al.* Effect of nurse-led multidisciplinary rounds on reducing the unnecessary use of urinary catheterization in hospitalized patients. *Infect Control Hosp Epidemiol.* 2008;29(9):815-819.
6. Huang WC, Wann SR, Lin SL, *et al.* Catheter-associated urinary tract infections in intensive care units can be reduced by prompting physicians to remove unnecessary catheters. *Infect Control Hosp Epidemiol.* 2004;25(11):974-978.
7. Jain M, Miller L, Belt D, *et al.* Decline in ICU adverse events, nosocomial infections and cost through a quality improvement initiative focusing on teamwork and culture change. *Qual Saf Health Care.* 2006;15(4):235-239.
8. Loeb M, Hunt D, O'Halloran K, *et al.* Stop orders to reduce inappropriate urinary catheterization in hospitalized patients: a randomized controlled trial. *J Gen Intern Med.* Jun 2008;23(6):816-820.
9. Murphy D, Francis K, Litzenberger M, *et al.* Reducing urinary tract infection: a nurse-initiated program. *Pa Nurse.* 2007;62(4):20.

10. Reilly L, Sullivan P, Ninni S, *et al.* Reducing foley catheter device days in an intensive care unit: using the evidence to change practice. *AACN Adv Crit Care*. 2006;17(3):272-283.
11. Saint S, Kaufman SR, Thompson M, *et al.* A reminder reduces urinary catheterization in hospitalized patients. *Jt Comm J Qual Patient Saf*. 2005;31(8):455-462.
12. Stephan F, Sax H, Wachsmuth M, *et al.* Reduction of urinary tract infection and antibiotic use after surgery: a controlled, prospective, before-after intervention study. *Clin Infect Dis*. 2006;42(11):1544-1551.
13. Topal J, Conklin S, Camp K, *et al.* Prevention of nosocomial catheter-associated urinary tract infections through computerized feedback to physicians and a nurse-directed protocol. *Am J Med Qual*. 2005;20(3):121-126.
14. Weitzel T. To cath or not to cath? *Nursing*. 2008;38(2):20-21.
15. Bruminhent J, Keegan M, Lakhani A, *et al.* Effectiveness of a simple intervention for prevention of catheter-associated urinary tract infections in a community teaching hospital. *Am J Infect Control*. 2010;38(9):689-693.
16. Elpern EH, Killeen K, Ketchem A, *et al.* Reducing use of indwelling urinary catheters and associated urinary tract infections. *Am J Crit Care*. 2009;18(6):535-541; quiz 542.
17. Fuchs MA, Sexton DJ, Thornlow DK, *et al.* Evaluation of an evidence-based, nurse-driven checklist to prevent hospital-acquired catheter-associated urinary tract infections in intensive care units. *J Nurs Care Qual*. 2011;26(2):101-109.
18. Gotelli JM, Merryman P, Carr C, *et al.* A quality improvement project to reduce the complications associated with indwelling urinary catheters. *Urologic Nursing*. 2008;28(6):465-467.
19. Knoll BM, Wright D, Ellingson L, *et al.* Reduction of inappropriate urinary catheter use at a Veterans Affairs hospital through a multifaceted quality improvement program. *Clin Infect Dis*. 2011; 52(11):1283-1290.
20. Robinson S, Allen L, Barnes MR, *et al.* Development of an evidence-based protocol for reduction of indwelling urinary catheter usage. *Medsurg Nurs*. 2007;16(3):157-161.

21. Rothfeld AF, Stickley A. A program to limit urinary catheter use at an acute care hospital. *Am J Infect Control*. 2010;38(7):568-571.
22. Schultz P, Aljawawdeh A, Hopp T. EB105: Reducing use of indwelling urinary catheters with a nurse-driven protocol. *Crit Care Nurse*. 2011;31(2):e42-e42 (Abstract).
23. Seguin P, Laviolle B, Isslame S, *et al*. Effectiveness of simple daily sensitization of physicians to the duration of central venous and urinary tract catheterization. *Intensive Care Med*. 2010;36(7):1202-1206.
24. van den Broek PJ, Wille JC, van Benthem BHB, *et al*. Urethral catheters: can we reduce use? *BMC Urology*. 2011;11:10.
25. Voss AB. Incidence and duration of urinary catheters in hospitalized older adults: before and after implementing a geriatric protocol. *J Gerontol Nurs*. 2009;35(6):35-41.
26. Wenger JE. Cultivating quality: reducing rates of catheter-associated urinary tract infection. *Am J Nurs*. 2010;110(8):40-45.
27. Adams D, Bucior H, Day G, *et al*. HOUDINI: make that urinary catheter disappear – nurse-led protocol. *J Infect Prev*. 2012;13(2):44-46.
28. Andreessen L, Wilde MH, Herendeen P. Preventing catheter-associated urinary tract infections in acute care: the bundle approach. *J Nurs Care Qual*. 2012;27(3):209-217.
29. Roser L, Altpeter T, Anderson D, *et al*. A nurse driven Foley catheter removal protocol proves clinically effective to reduce the incidents of catheter related urinary tract infections. *Am J Infect Control*. 2012;40(5):e92-93 (Abstract).
30. Titsworth WL, Hester J, Correia T, *et al*. Reduction of catheter-associated urinary tract infections among patients in a neurological intensive care unit: a single institution's success. *J Neurosurg*. 2012;116(4):911-920.
31. Palese A, Buchini S, Deroma L, *et al*. The effectiveness of the ultrasound bladder scanner in reducing urinary tract infections: a meta-analysis. *J Clin Nurs*. Nov 2010;19(21-22):2970-2979.

32. Lee YY, Tsay WL, Lou MF, *et al.* The effectiveness of implementing a bladder ultrasound programme in neurosurgical units. *J Adv Nurs.* 2007;57(2):192-200.
33. Frederickson M, Neitzel JJ, Miller EH, *et al.* The implementation of bedside bladder ultrasound technology: effects on patient and cost postoperative outcomes in tertiary care. *Orthop Nurs.* 2000;19(3):79-87.
34. Slappendel R, Weber EW. Non-invasive measurement of bladder volume as an indication for bladder catheterization after orthopaedic surgery and its effect on urinary tract infections. *Eur J Anaesthesiol.* 1999;16(8):503-506.
35. Meddings J, Rogers MA, Macy M, *et al.* Systematic review and meta-analysis: reminder systems to reduce catheter-associated urinary tract infections and urinary catheter use in hospitalized patients. *Clin Infect Dis.* 2010;51(5):550-560.
36. Fakih MG, Pena ME, Shemes S, *et al.* Effect of establishing guidelines on appropriate urinary catheter placement. *Acad Emerg Med.* 2010;17(3):337-340.
37. Fakih MG, Watson SR, Greene MT, *et al.* Reducing inappropriate urinary catheter use: a statewide effort. *Arch Intern Med.* 2012;172(3):255-260.
38. Gokula RM, Smith MA, Hickner J. Emergency room staff education and use of a urinary catheter indication sheet improves appropriate use of foley catheters. *Am J Infect Control.* 2007;35(9):589-593.
39. Patrizzi K, Fasnacht A, Manno M. A collaborative, nurse-driven initiative to reduce hospital-acquired urinary tract infections. *J Emerg Nurs.* 2009;35(6):536-539.
