# Supplementary material
Source: PubMed Central journal article supplement (PMC3963554)
Supplement: bmjqs-2012-001774-s2.pdf [file bmjqs-2012-001774-s2.pdf]

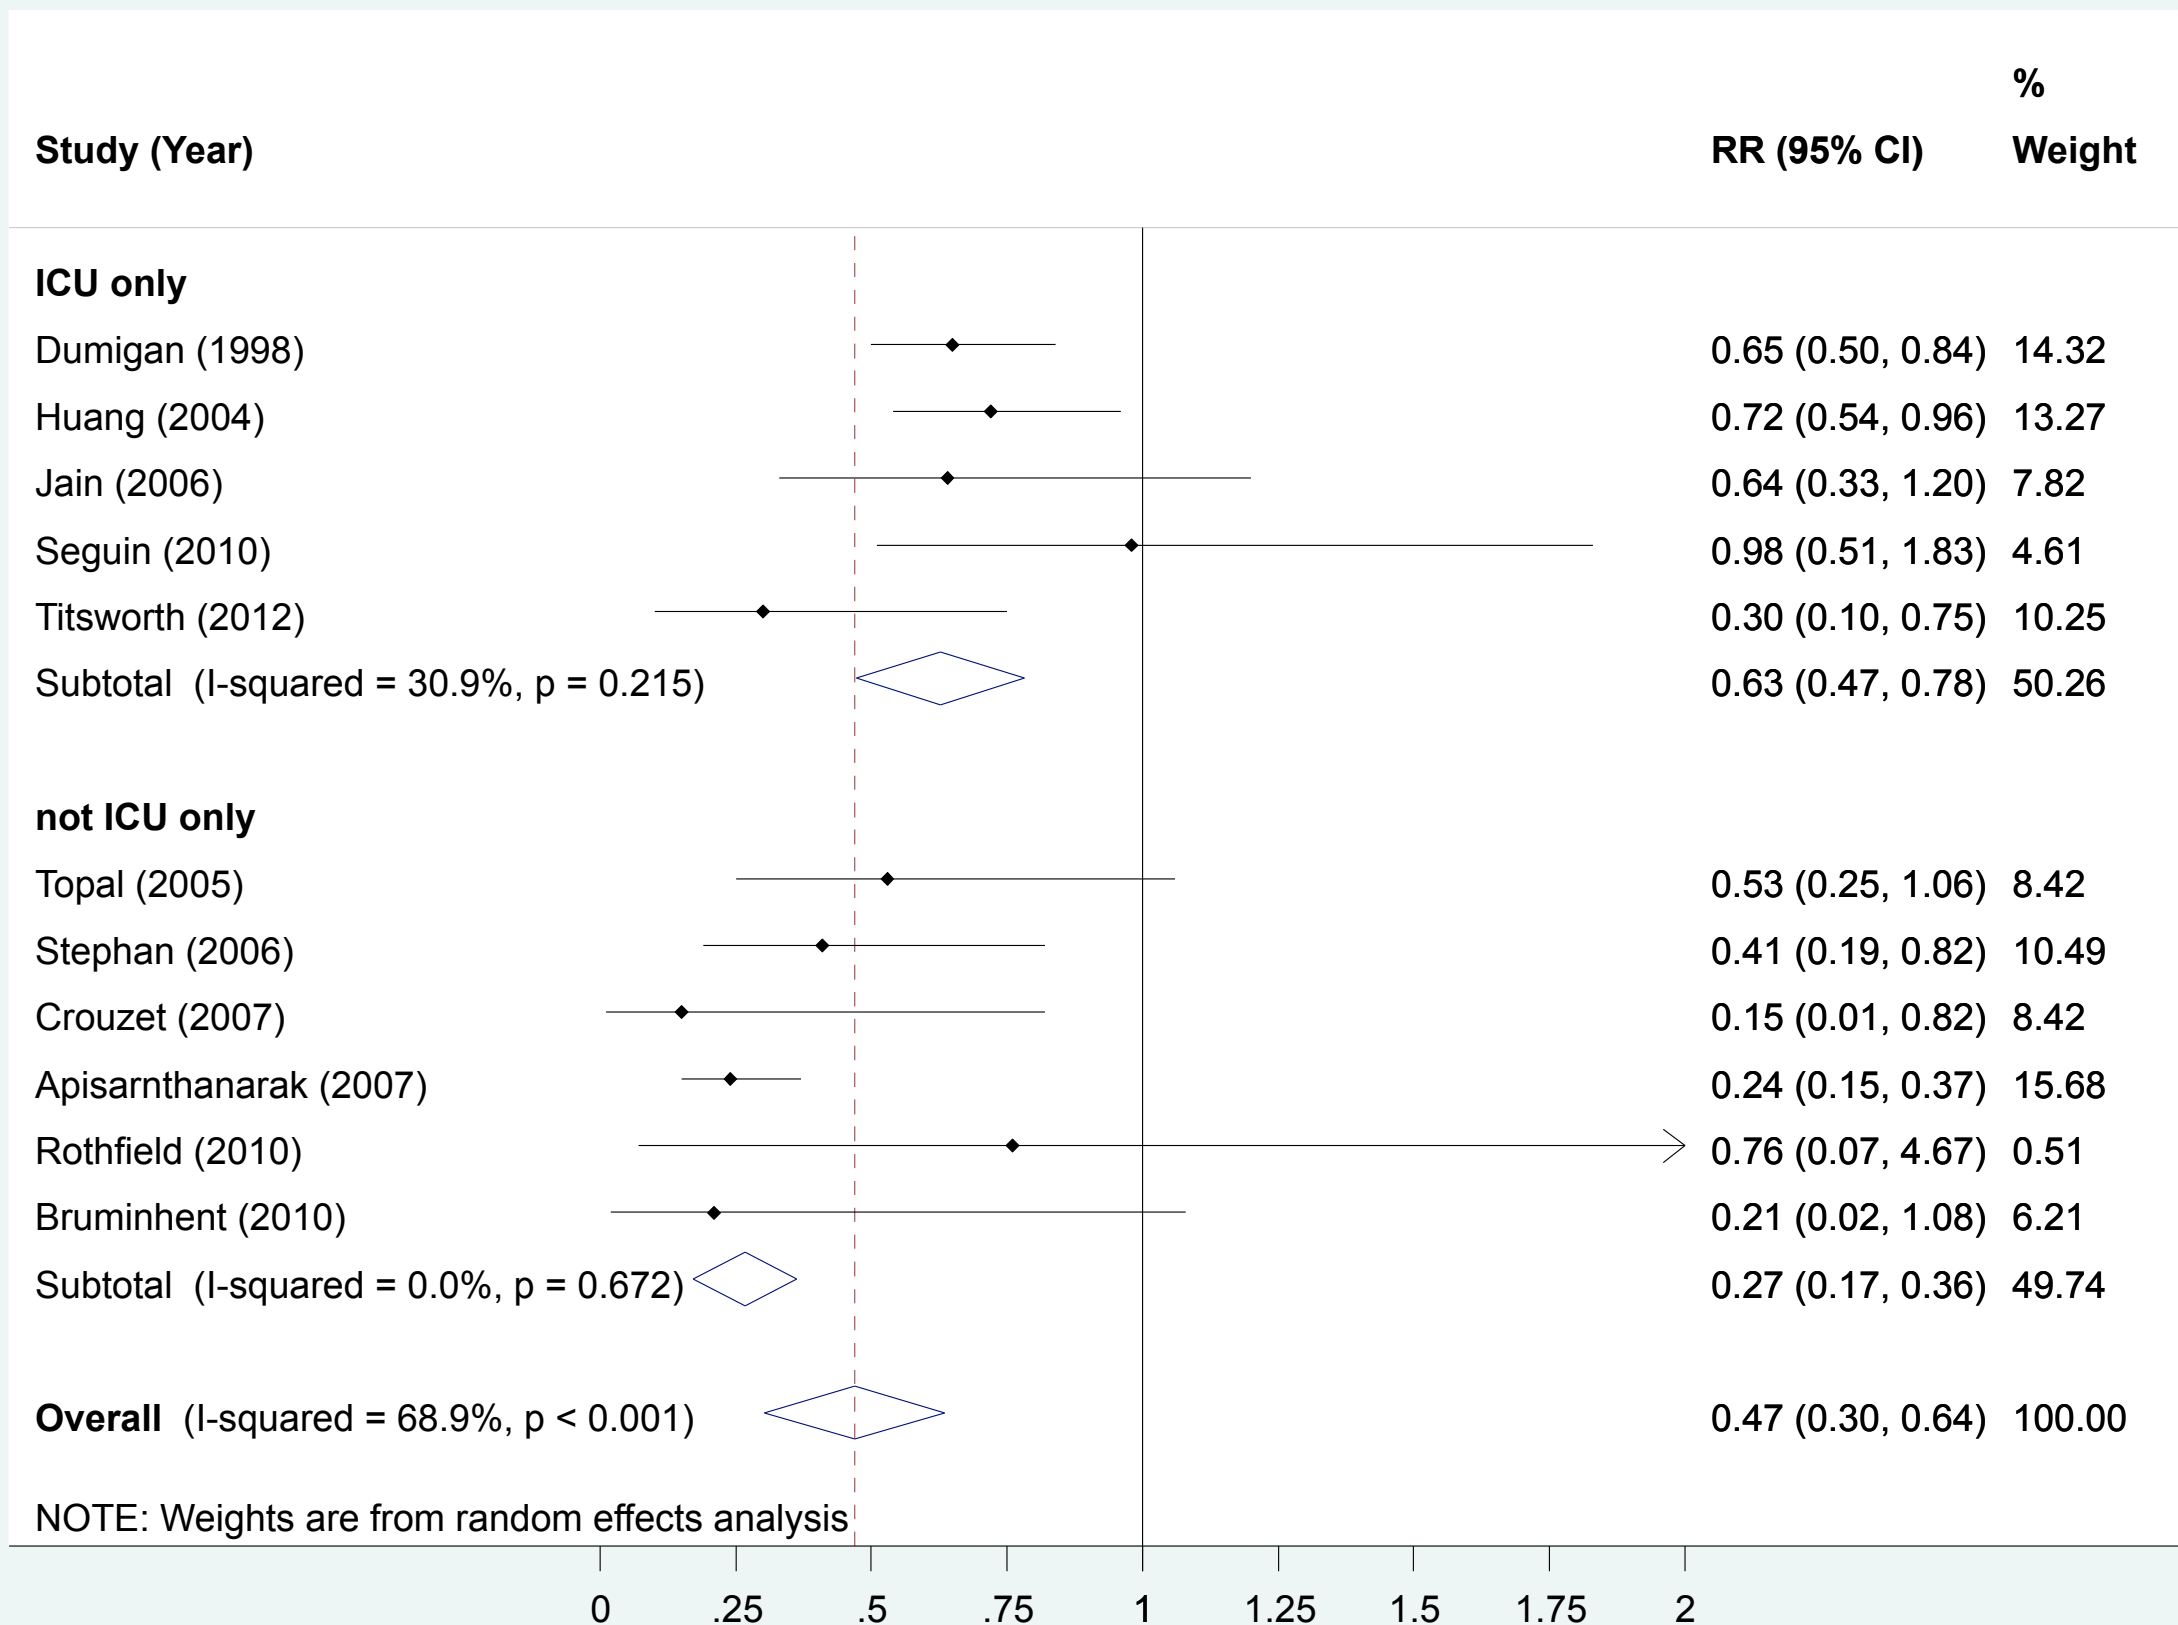

**Appendix Figure 1.** Meta-analysis of rate ratios (RRs) for catheter-associated urinary tract infection (CAUTI) episodes per 1000 catheter days, for intervention vs. control groups, stratified by focus on intensive care units (ICUs). CI, confidence interval
